# Supplementary material for: Protein arginine methyltransferase 8 regulates ferroptosis and macrophage polarization in spinal cord injury via glial cell‐derived neurotrophic factor
Source: PubMed Central journal article supplement (PMC10352898; doi:10.1111/cns.14162), 2023-03-13

**The original image of western blot**

**Full unedited gel/blot for Figure 1J GAPDH**

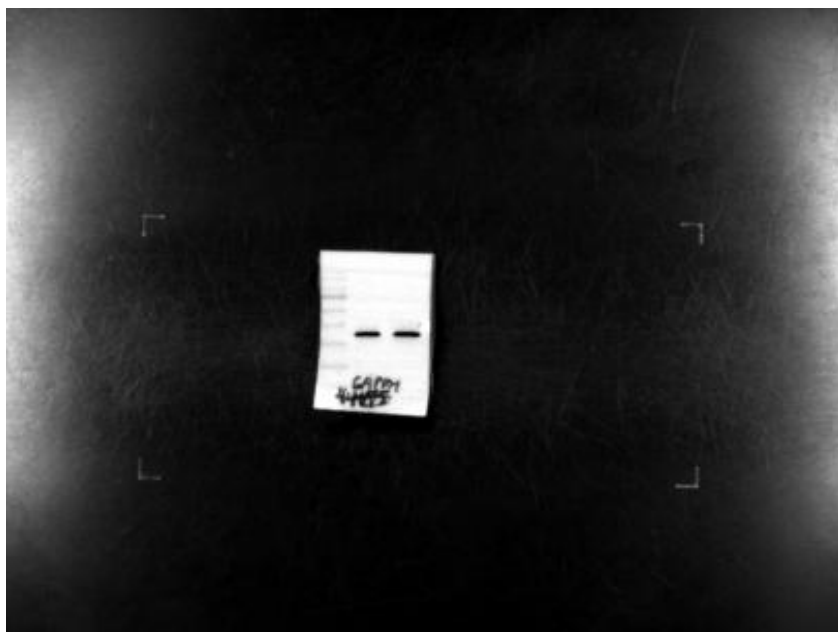

**Full unedited gel/blot for Figure 1J 4HNE**

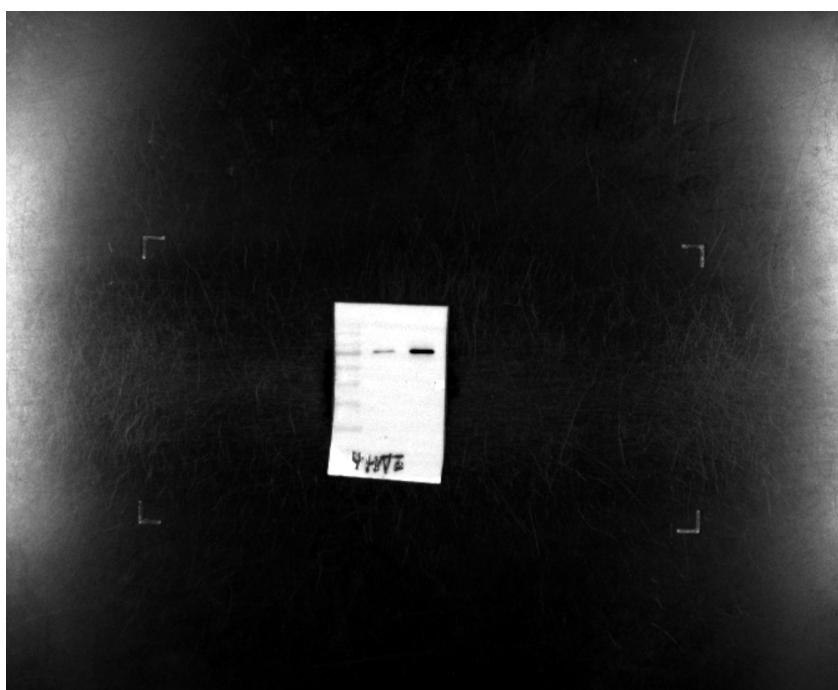

Full unedited gel/blot for Figure 1J Arg1

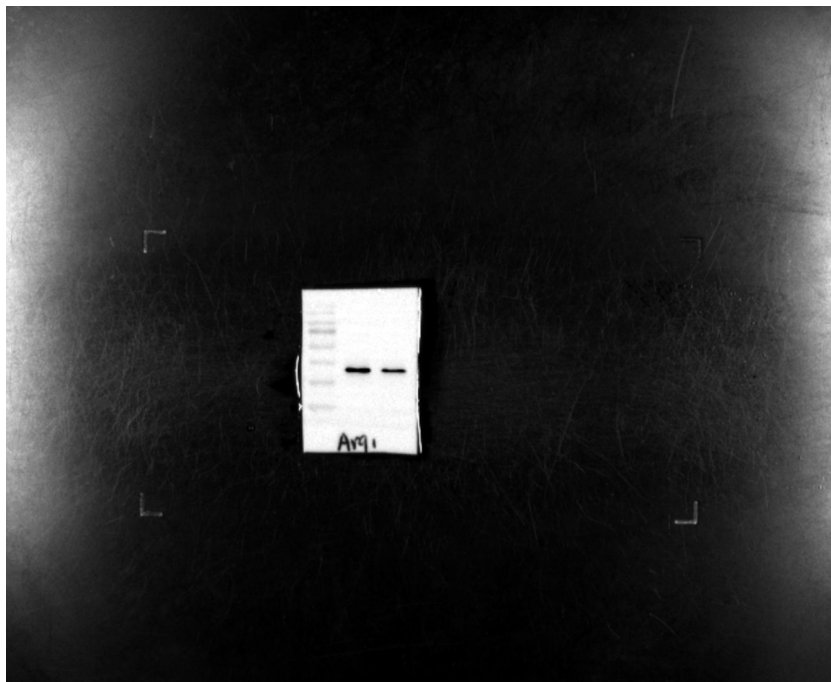

Full unedited gel/blot for Figure 1J CD16

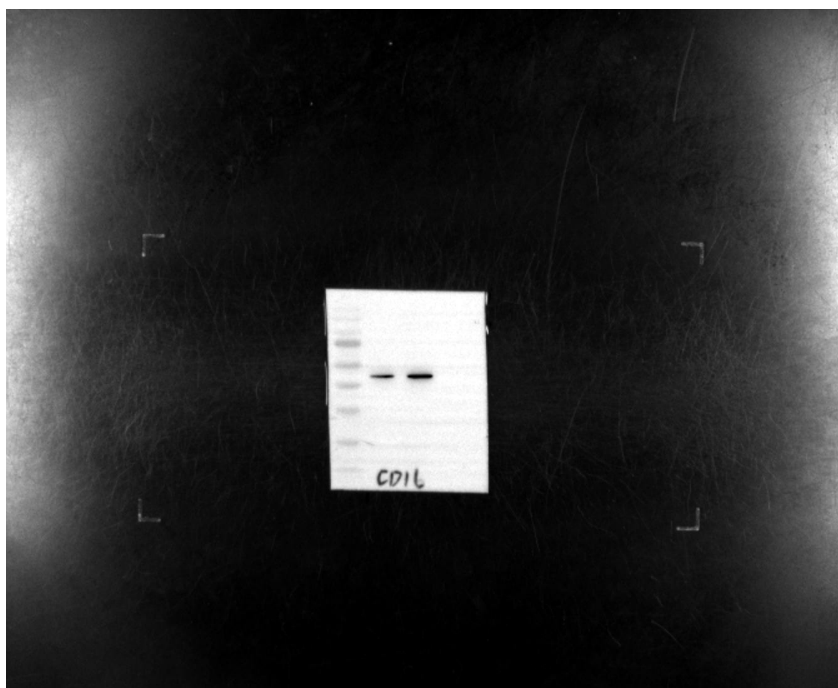

Full unedited gel/blot for Figure 1J GPX4

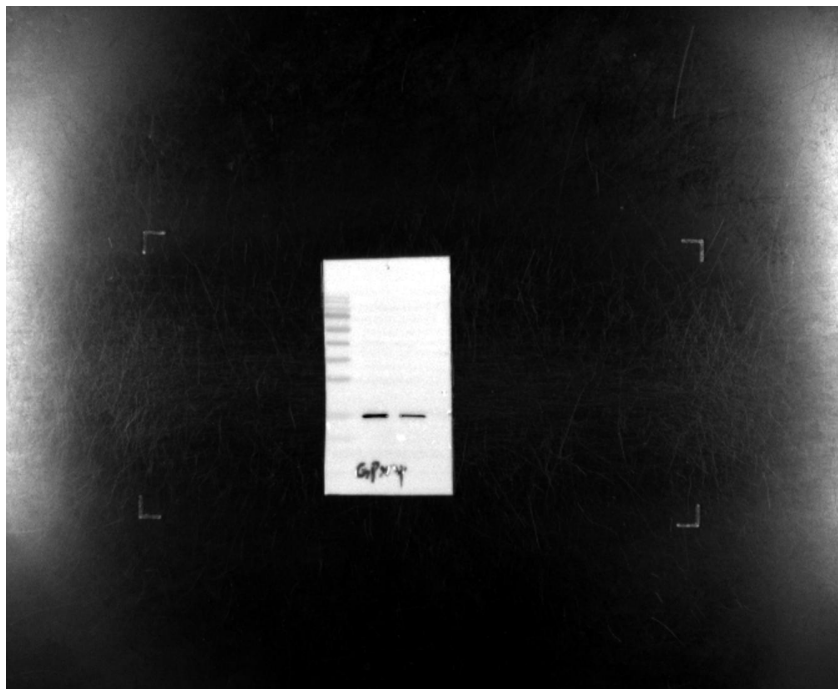

Full unedited gel/blot for Figure 1J INOS

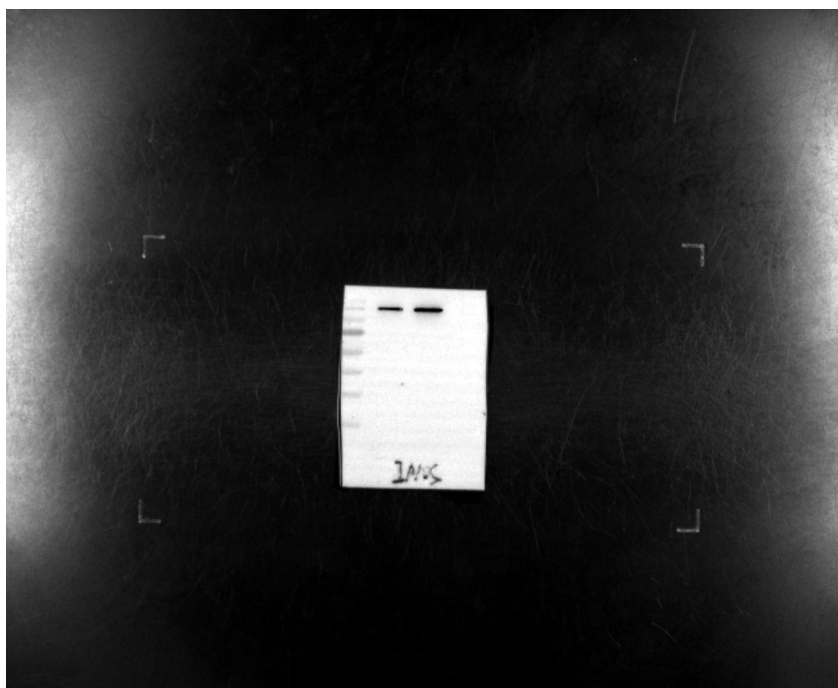

Full unedited gel/blot for Figure 1J XCT

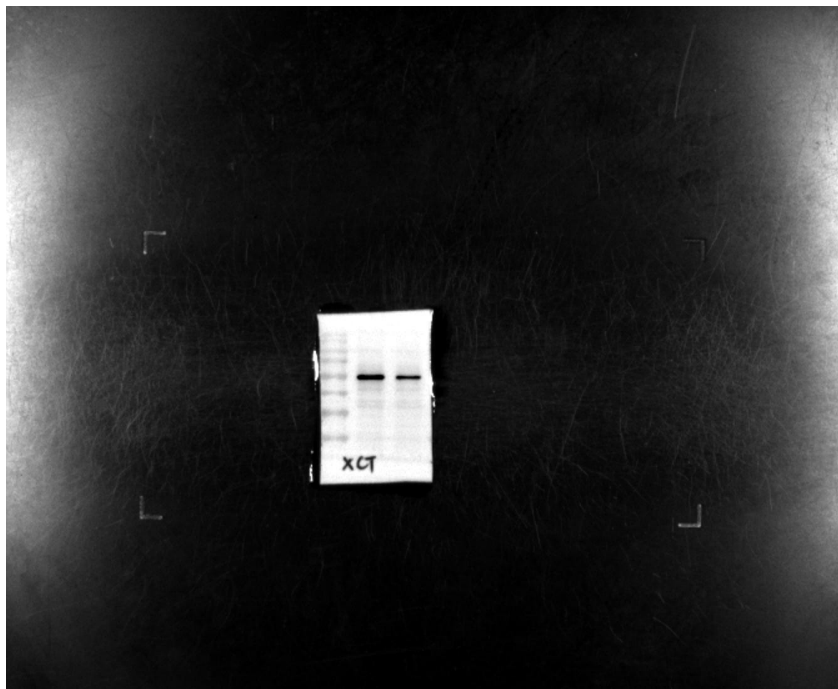

Full unedited gel/blot for Figure 1K GAPDH

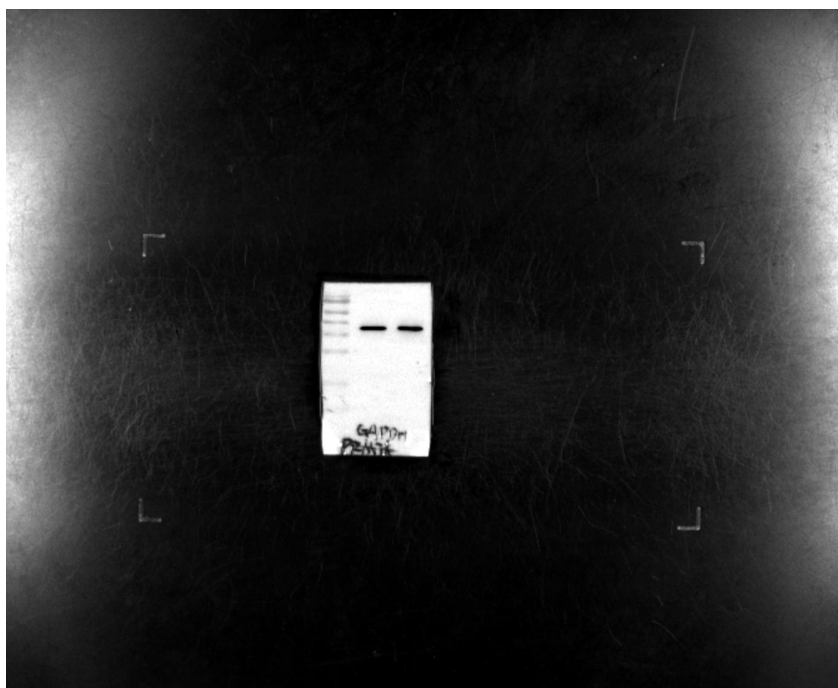

Full unedited gel/blot for Figure 1K PRMT8

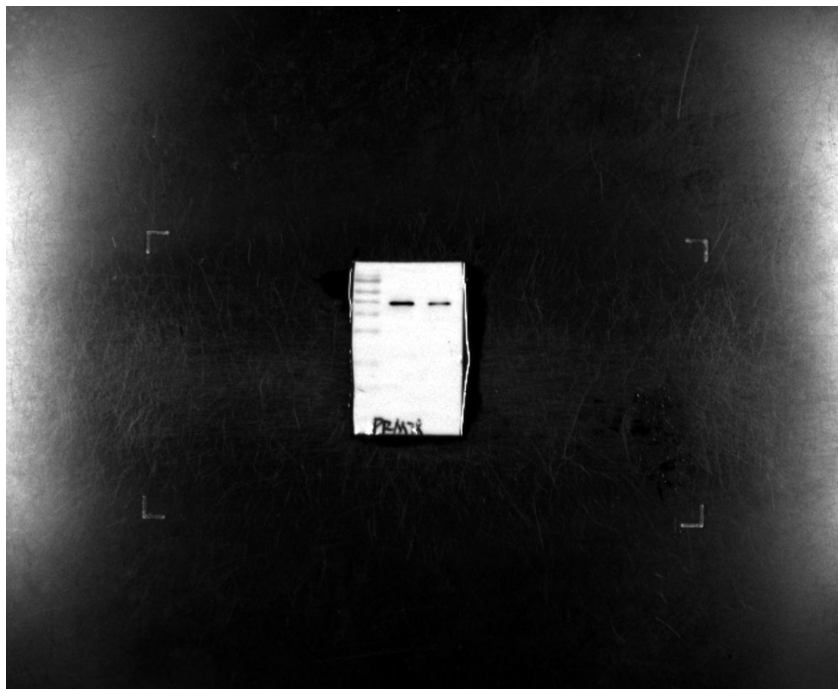

Full unedited gel/blot for Figure 2A GAPDH

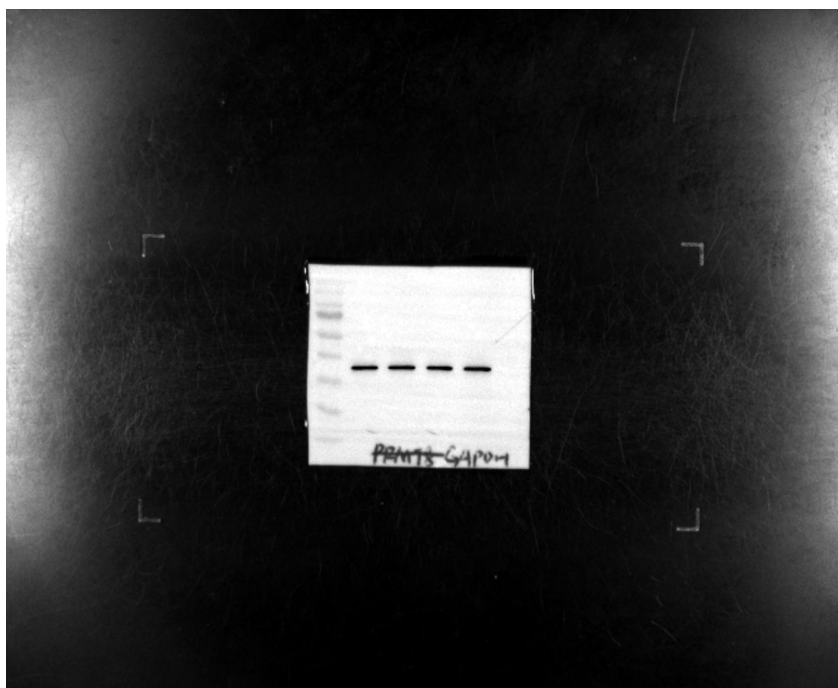

Full unedited gel/blot for Figure 2A PRMT8

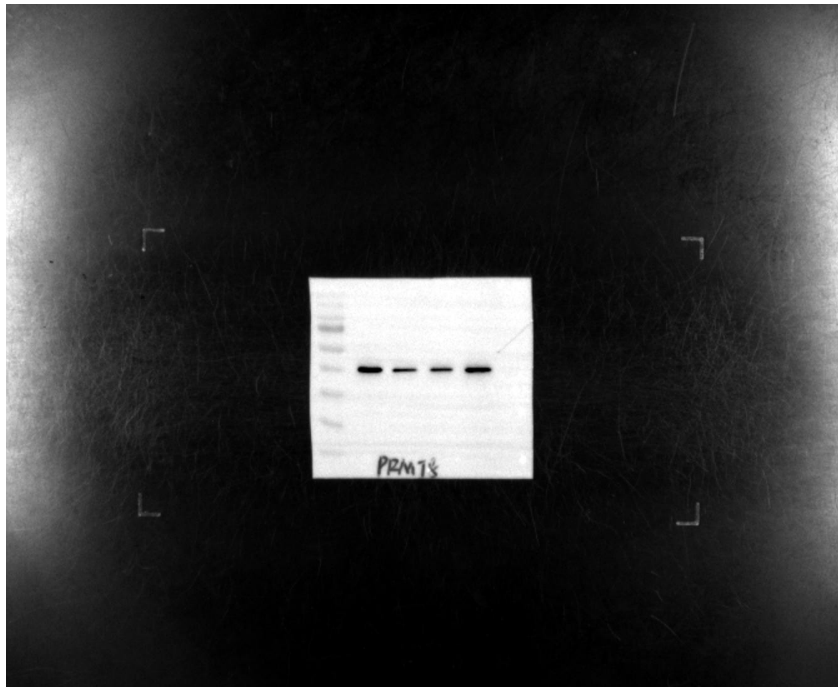

Full unedited gel/blot for Figure 2D GAPDH

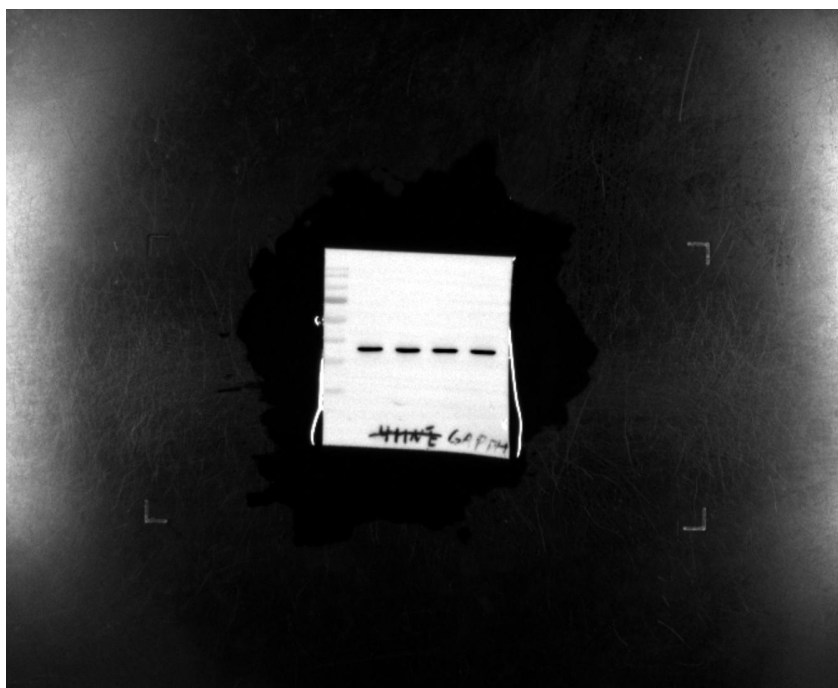

Full unedited gel/blot for Figure 2D 4HNE

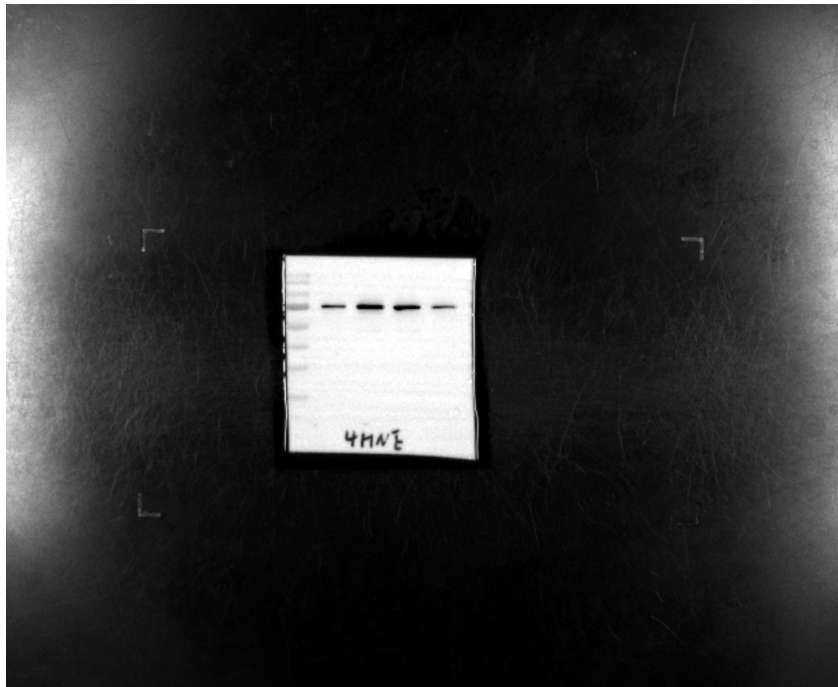

Full unedited gel/blot for Figure 2D HO-1

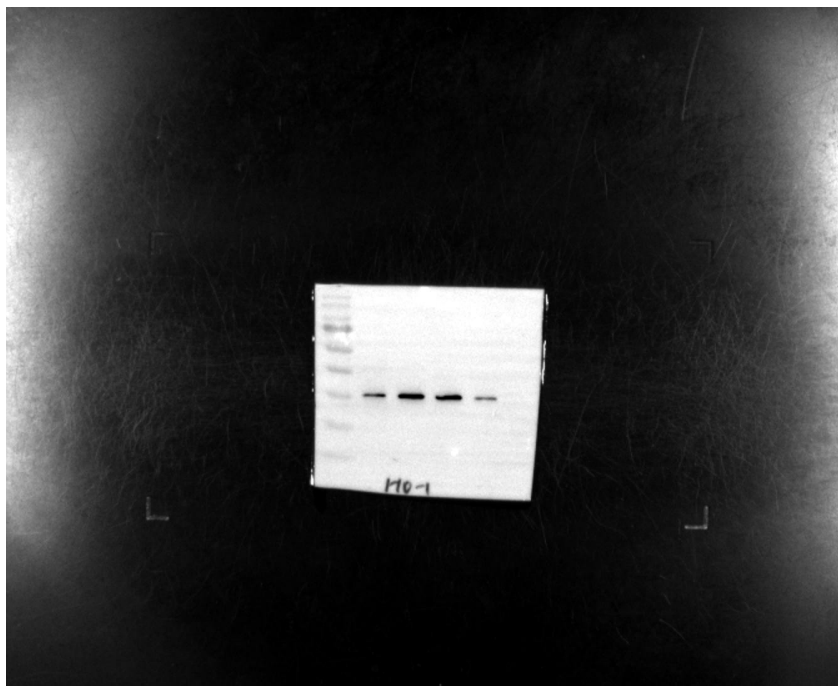

Full unedited gel/blot for Figure 2G GAPDH

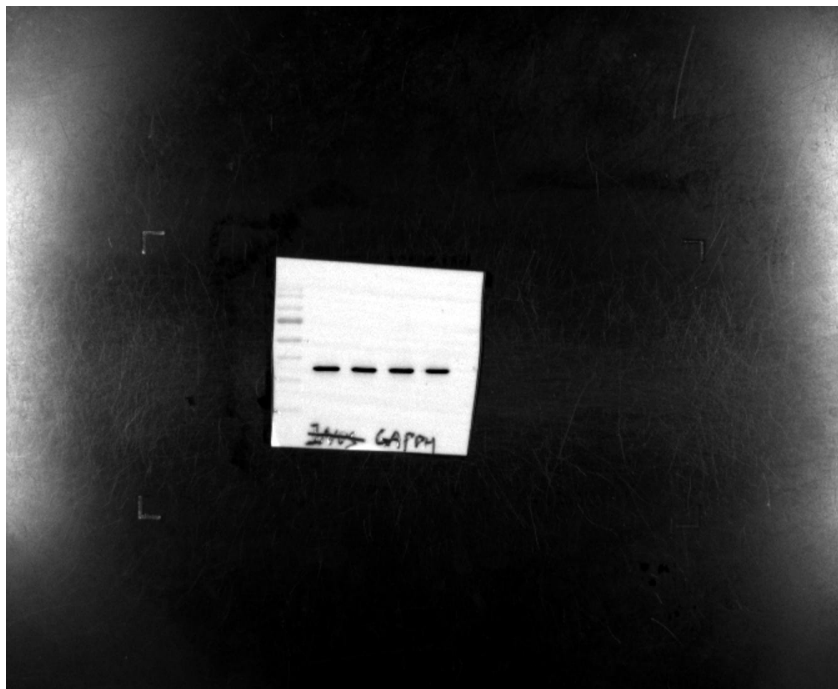

Full unedited gel/blot for Figure 2G Arg-1

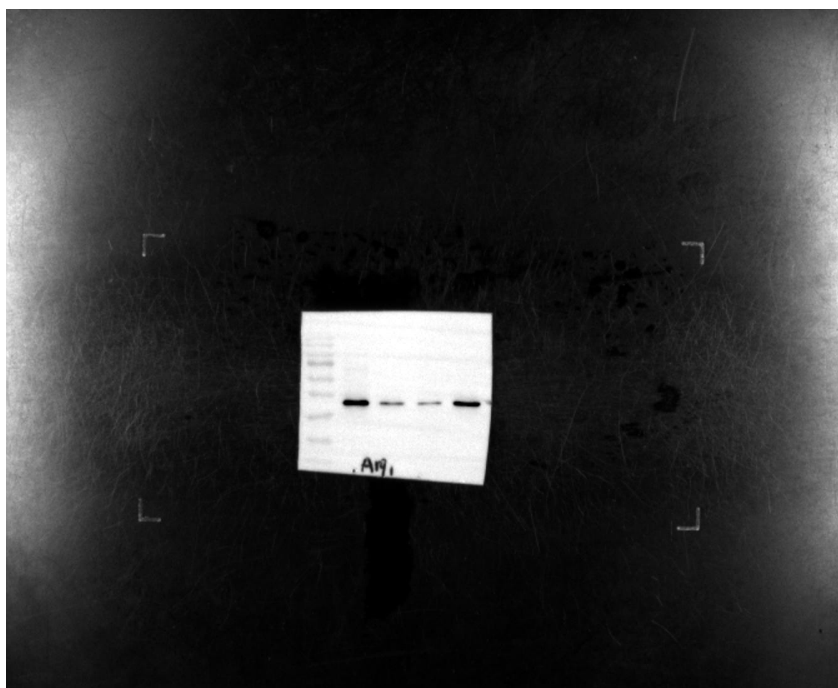



Full unedited gel/blot for Figure 2G INOS

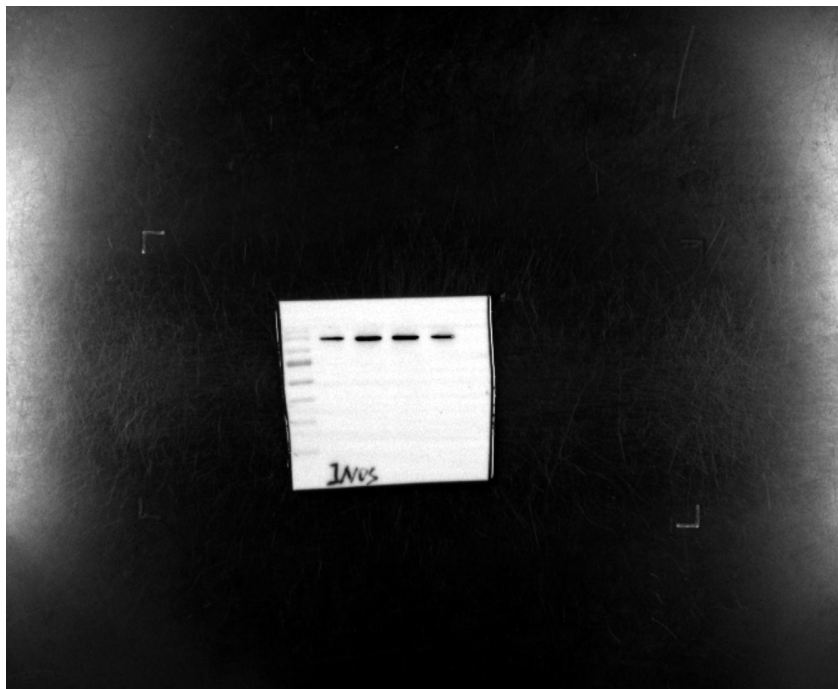

Full unedited gel/blot for Figure 3A GAPDH

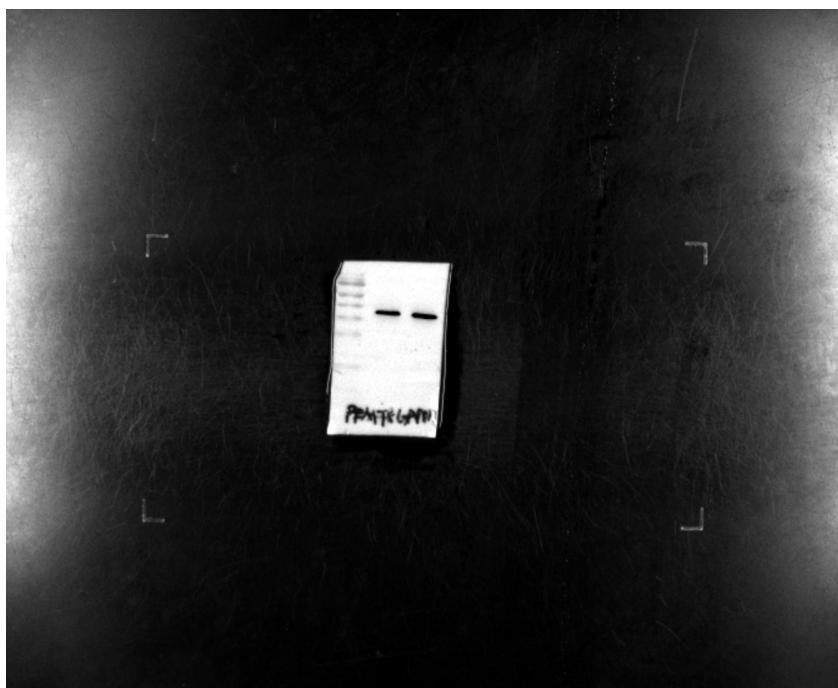

Full unedited gel/blot for Figure 3A PRMT8

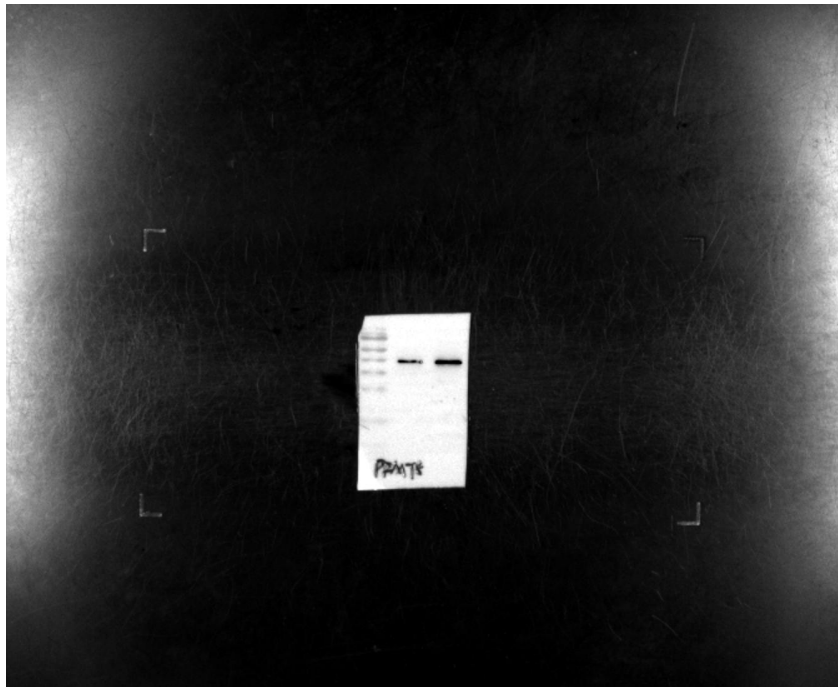

Full unedited gel/blot for Figure 3J GAPDH

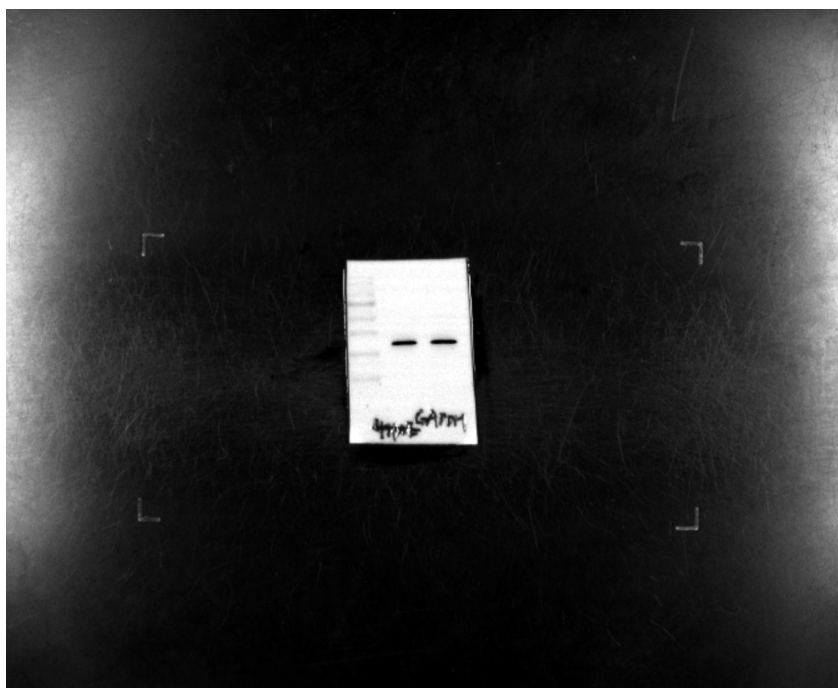

Full unedited gel/blot for Figure 3J 4HNE

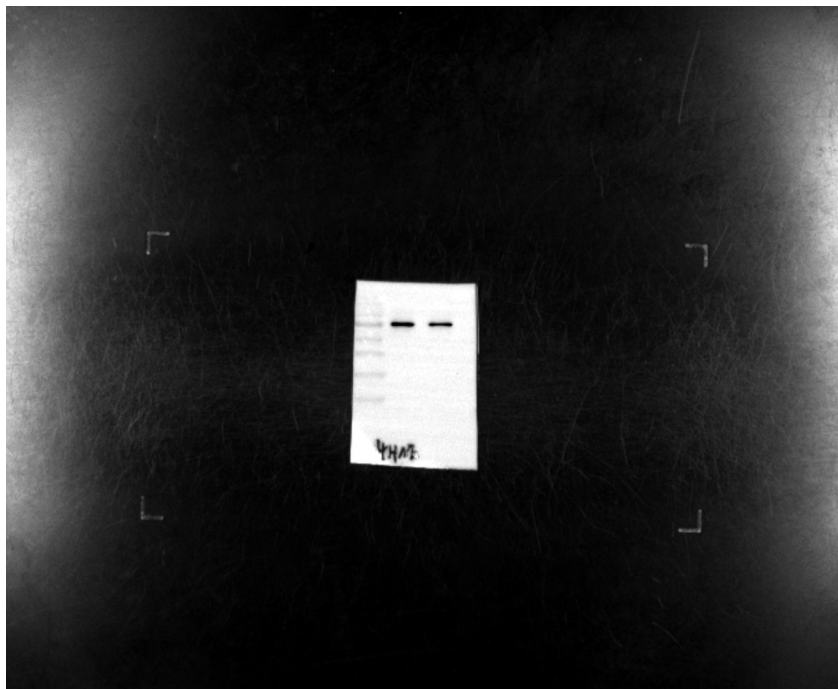

Full unedited gel/blot for Figure 3J Arg-1

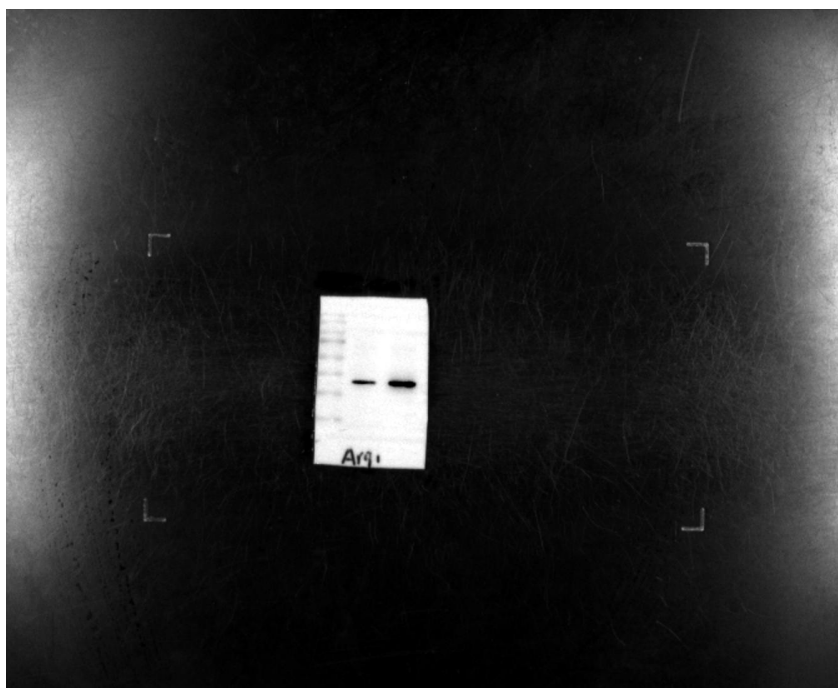

Full unedited gel/blot for Figure 3J CD14

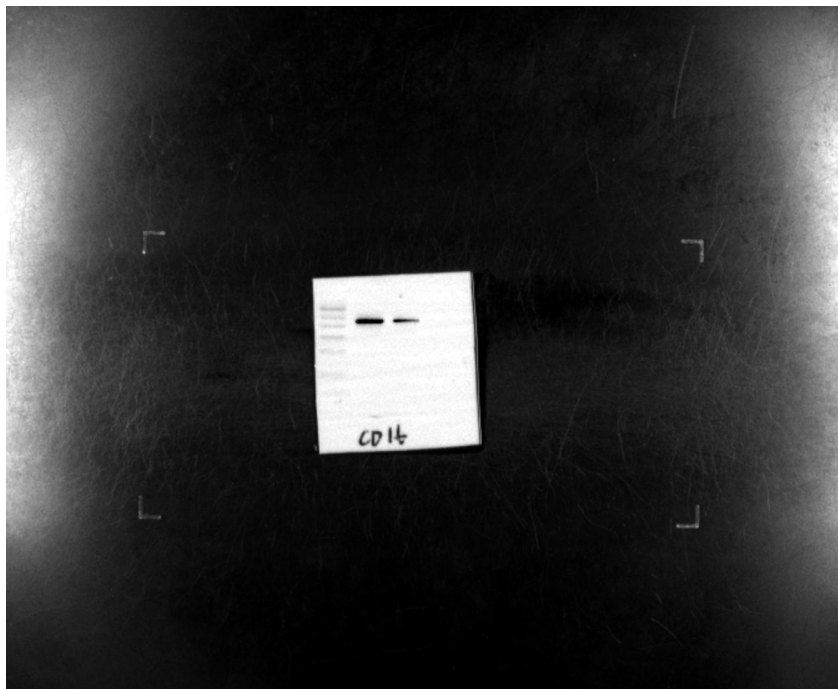

Full unedited gel/blot for Figure 3J GPX4

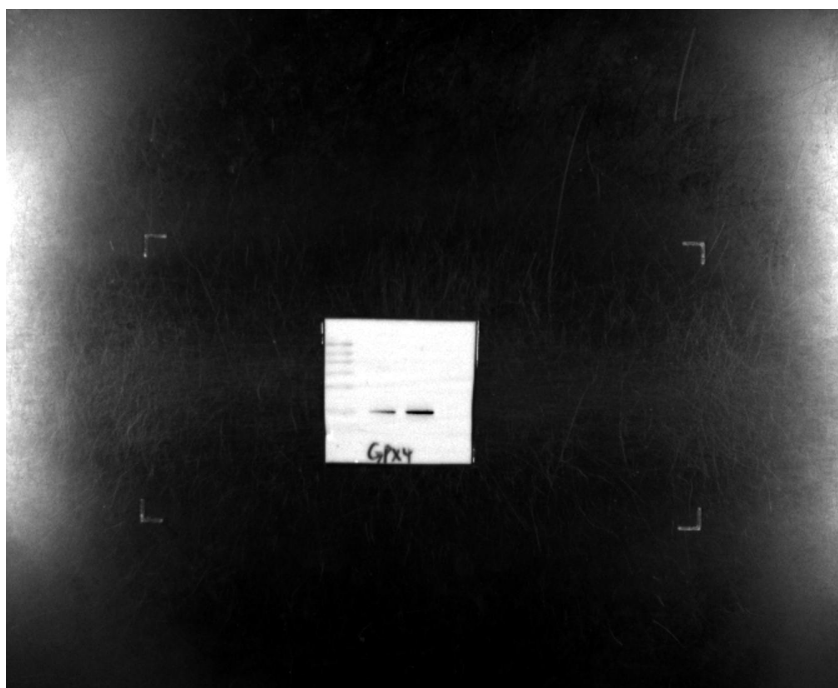

Full unedited gel/blot for Figure 3J INOS

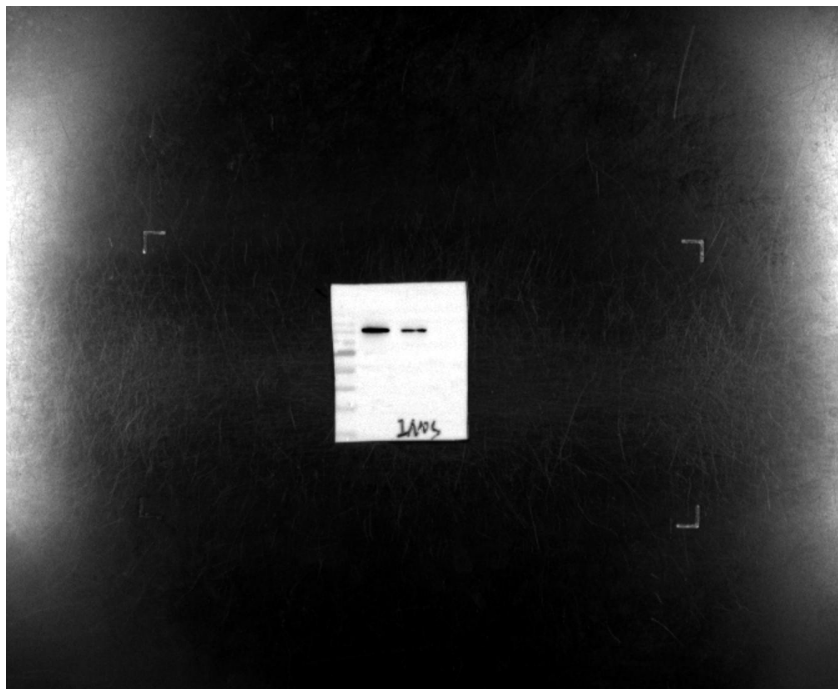

Full unedited gel/blot for Figure 3J XCT

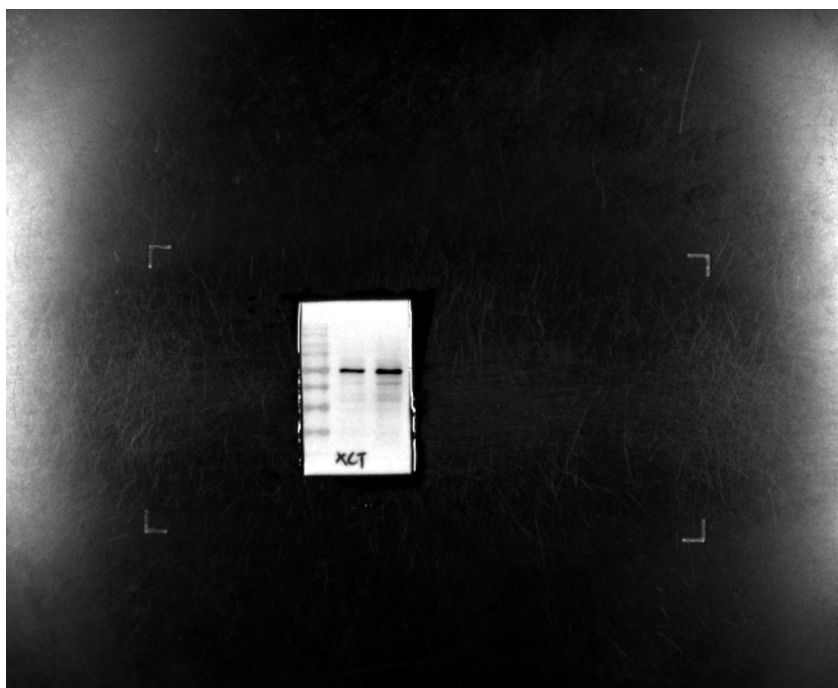

Full unedited gel/blot for Figure 4A GAPDH

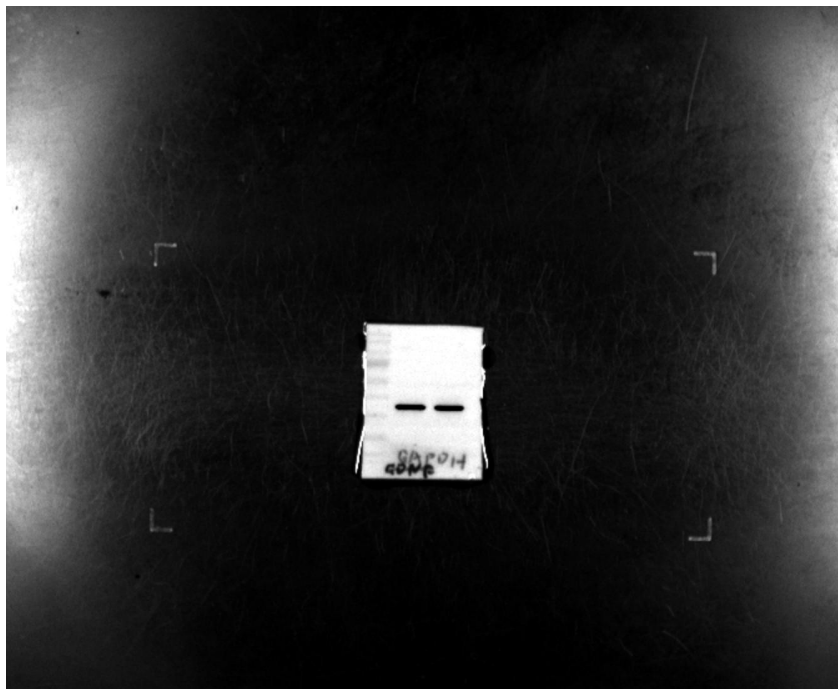

Full unedited gel/blot for Figure 4A GDNF

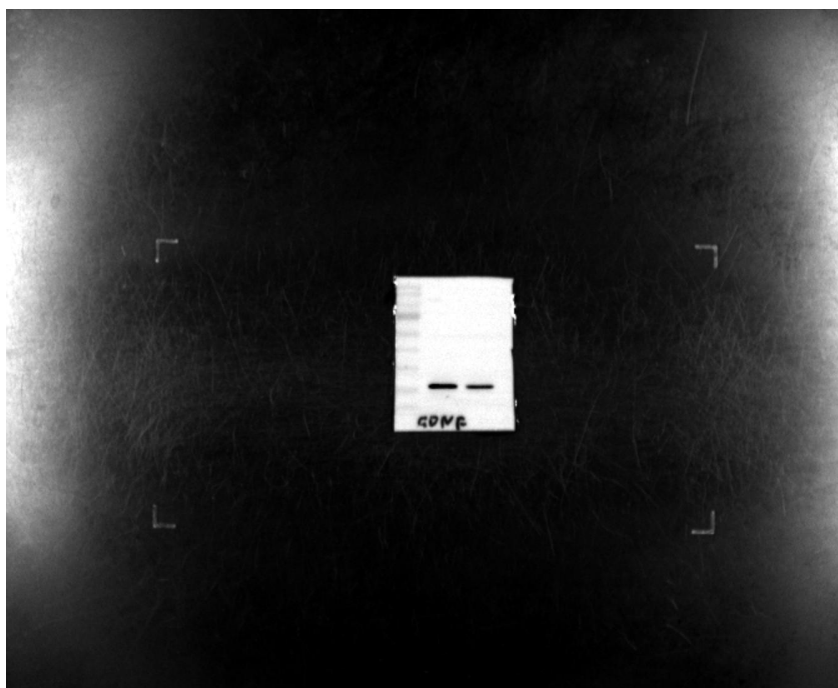

**Full unedited gel/blot for Figure 4C H3K4me3**

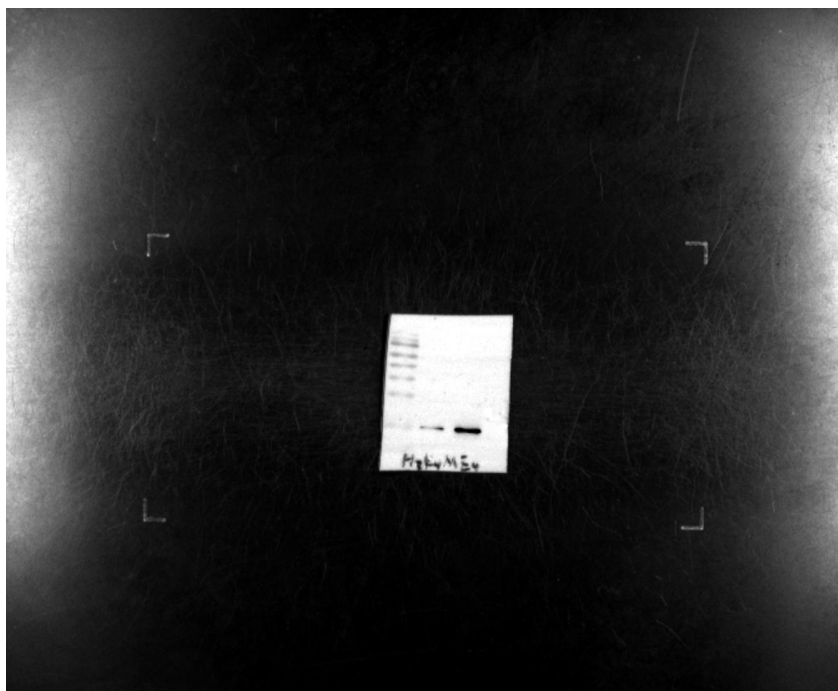

**Full unedited gel/blot for Figure 4C Lamin A**

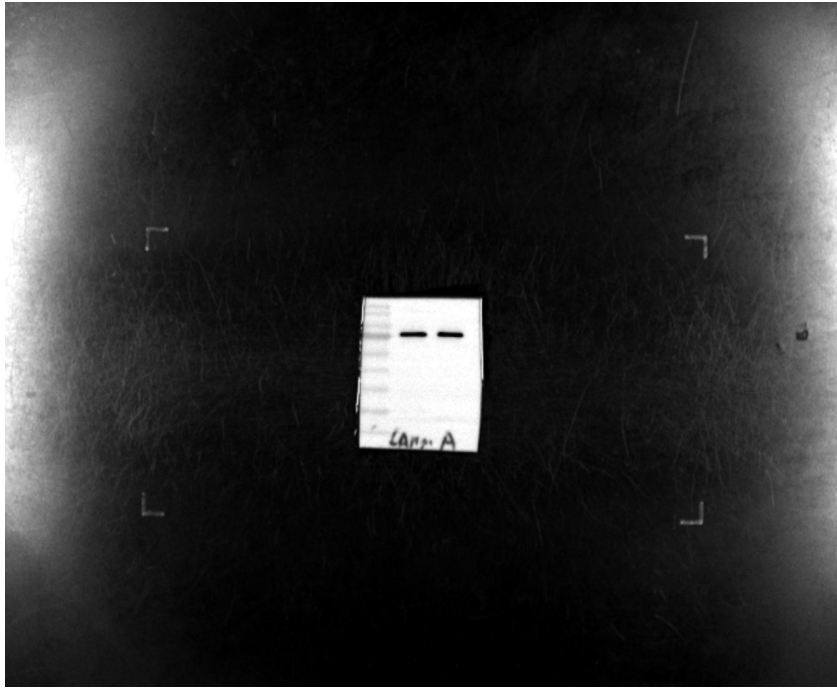

Full unedited gel/blot for Figure 4D GAPDH

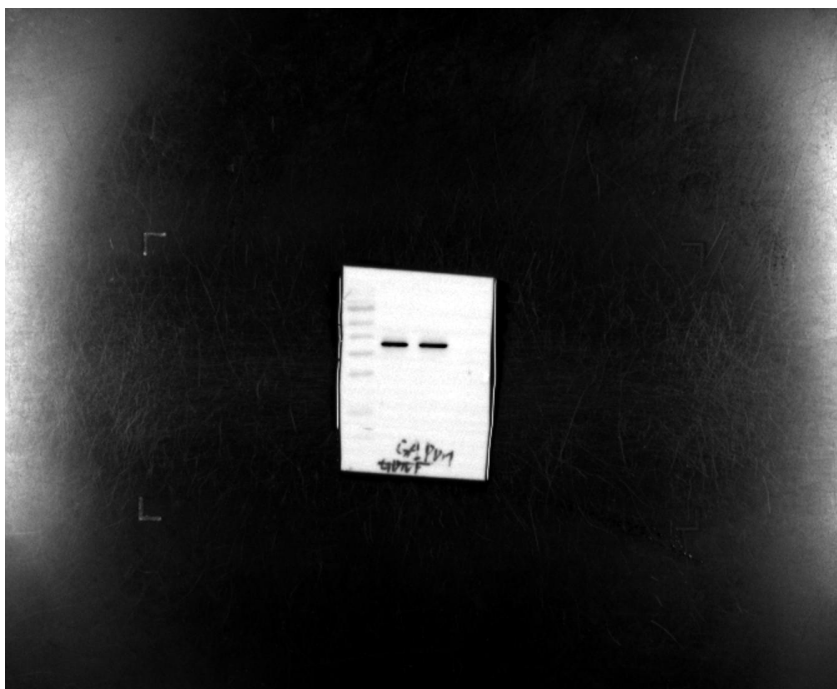

Full unedited gel/blot for Figure 4D GDNF



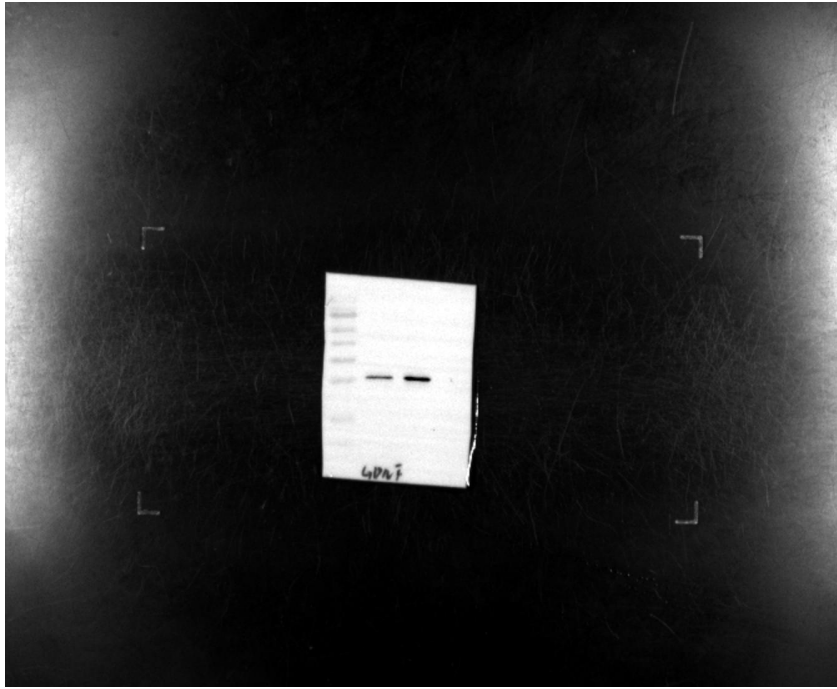

Full unedited gel/blot for Figure 4D PRMT8

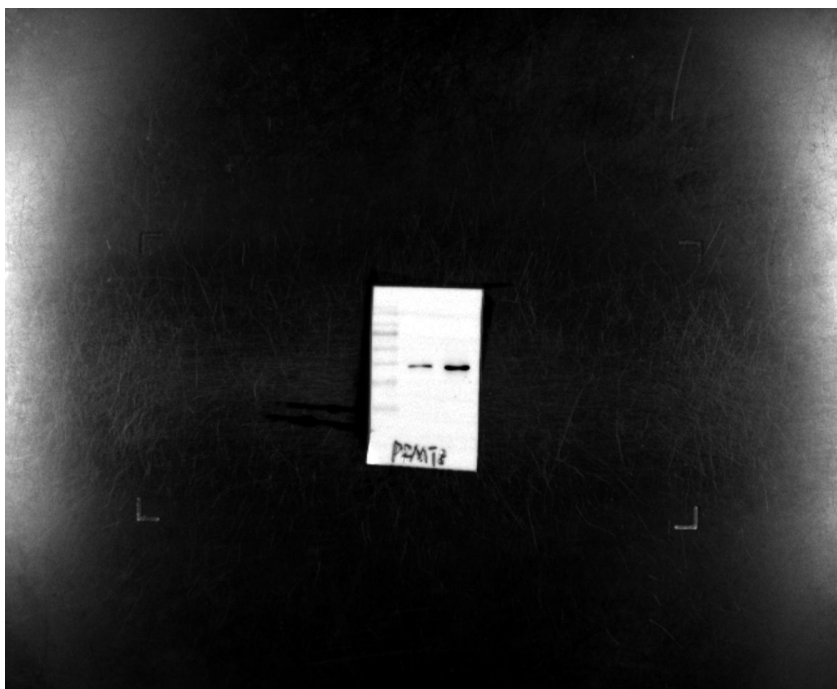

Full unedited gel/blot for Figure 5A GAPDH

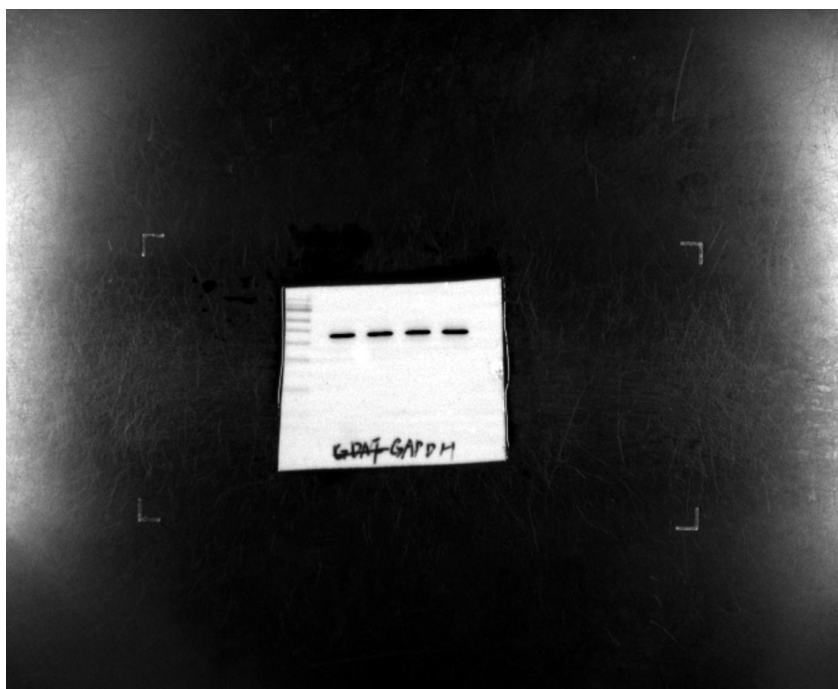

Full unedited gel/blot for Figure 5A GDNF

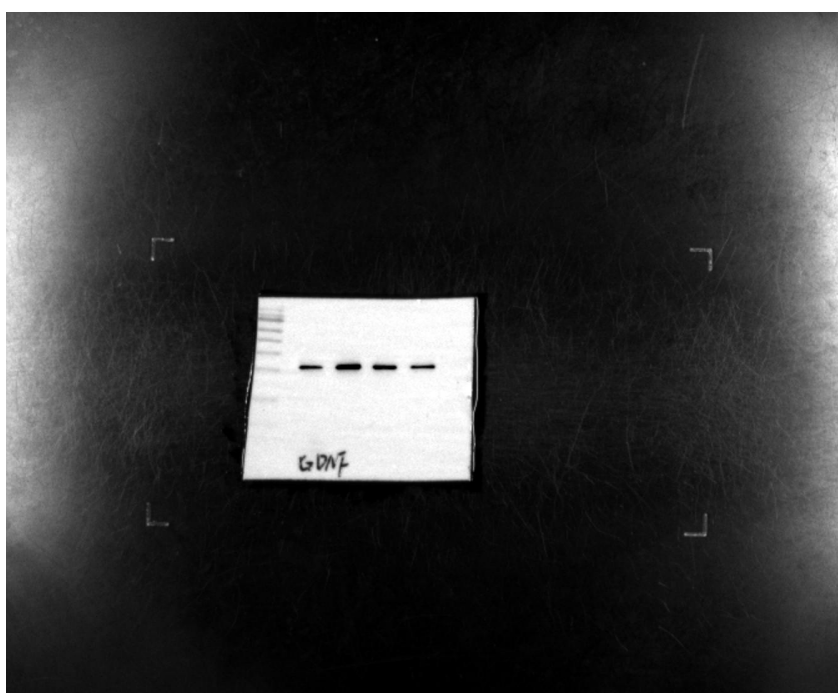

Full unedited gel/blot for Figure 5A PRMT8

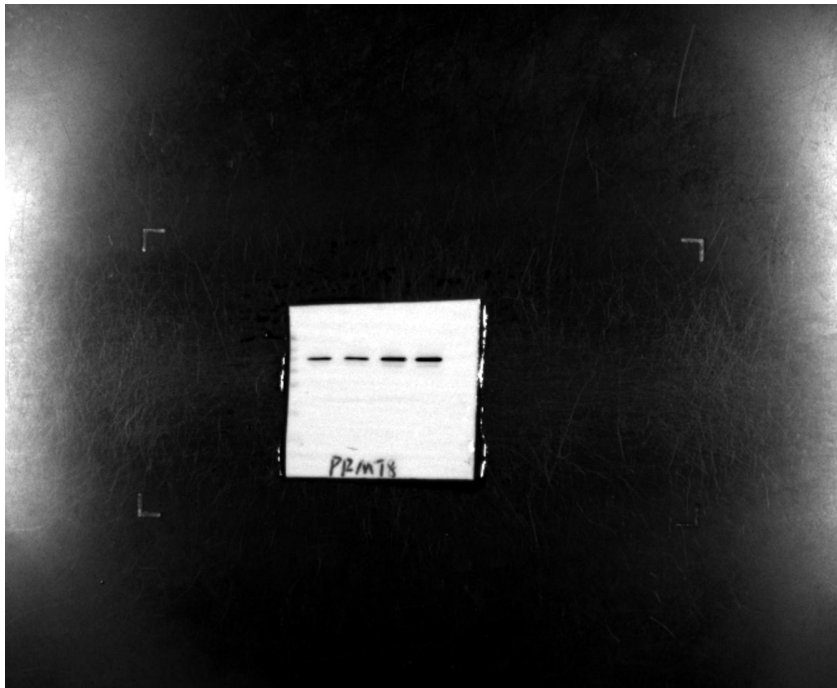

Full unedited gel/blot for Figure 5D GAPDH

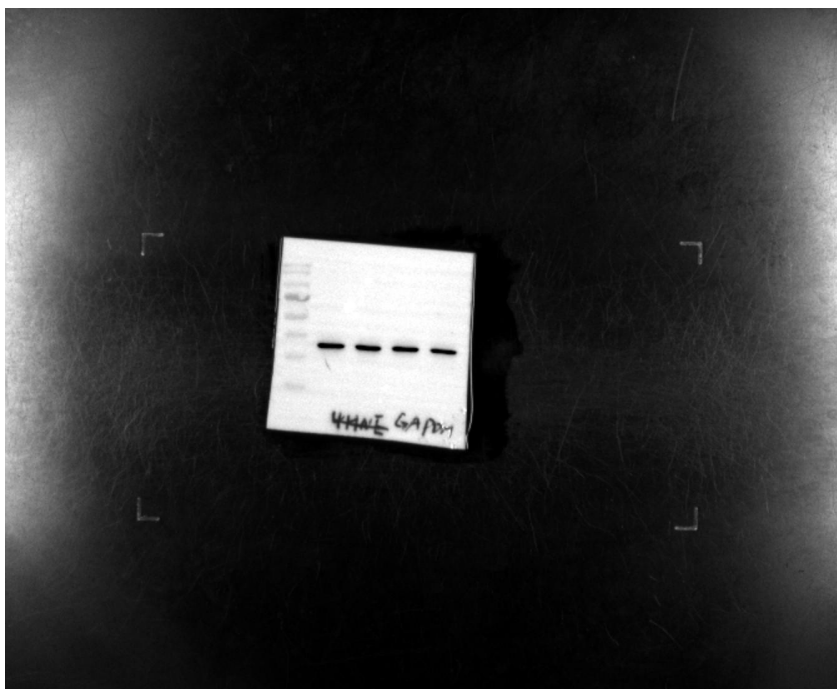

Full unedited gel/blot for Figure 5D 4HNE

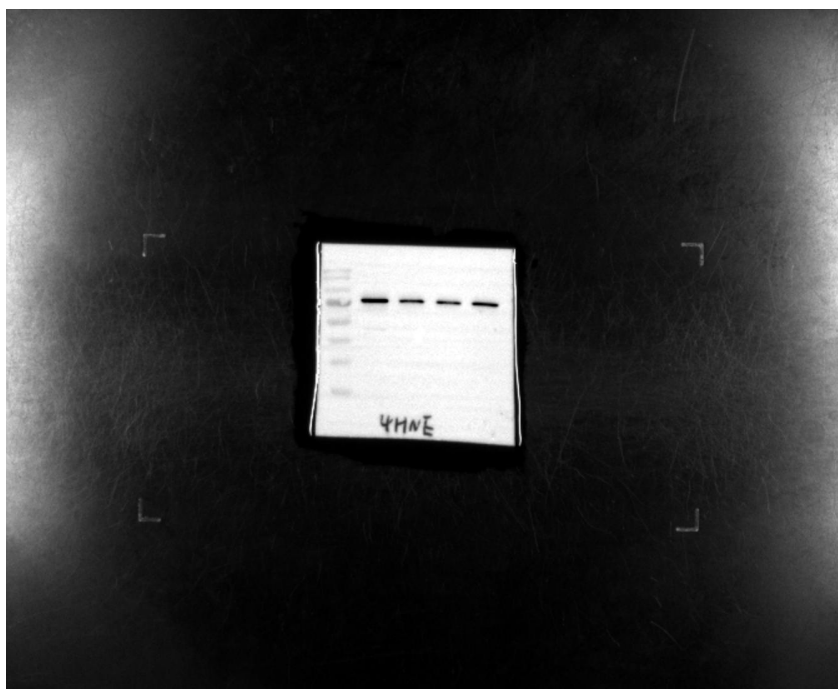

Full unedited gel/blot for Figure 5D HO-1

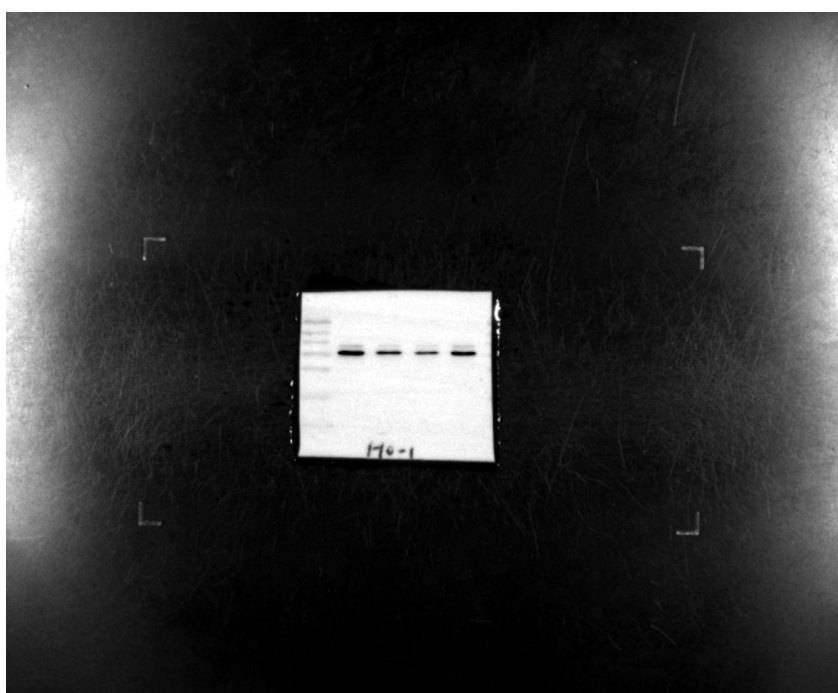

Full unedited gel/blot for Figure 5G GAPDH

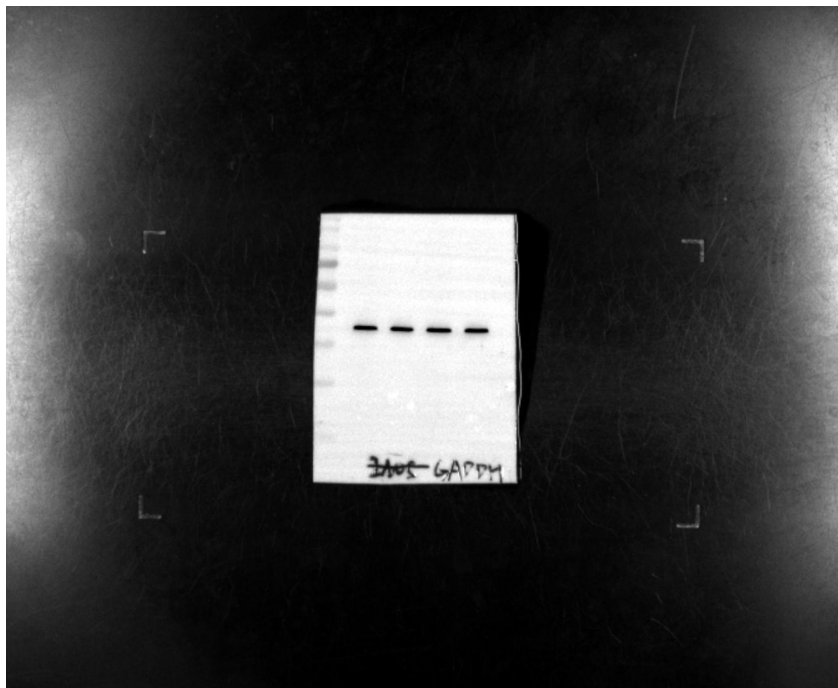

Full unedited gel/blot for Figure 5G Arg-1

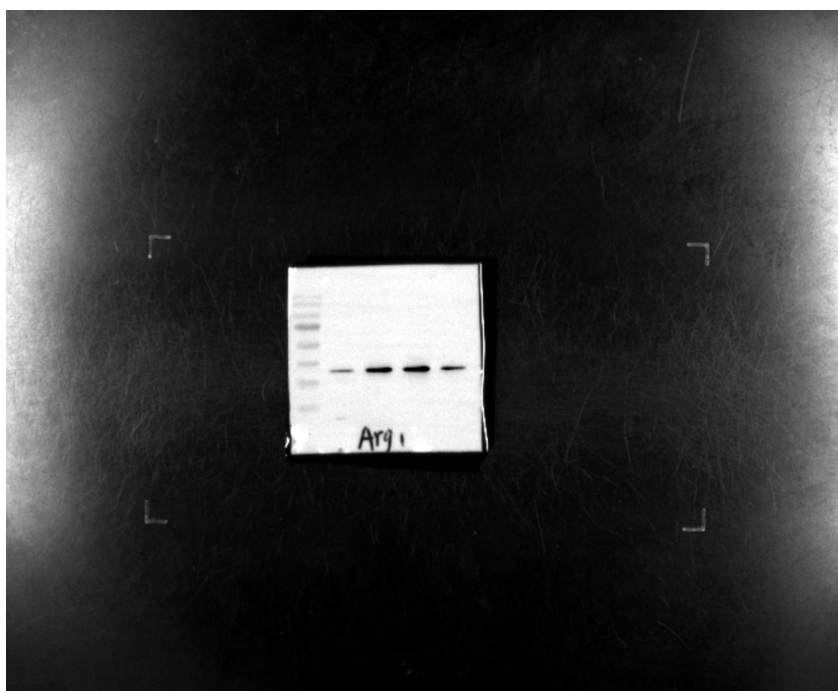

Full unedited gel/blot for Figure 5G INOS

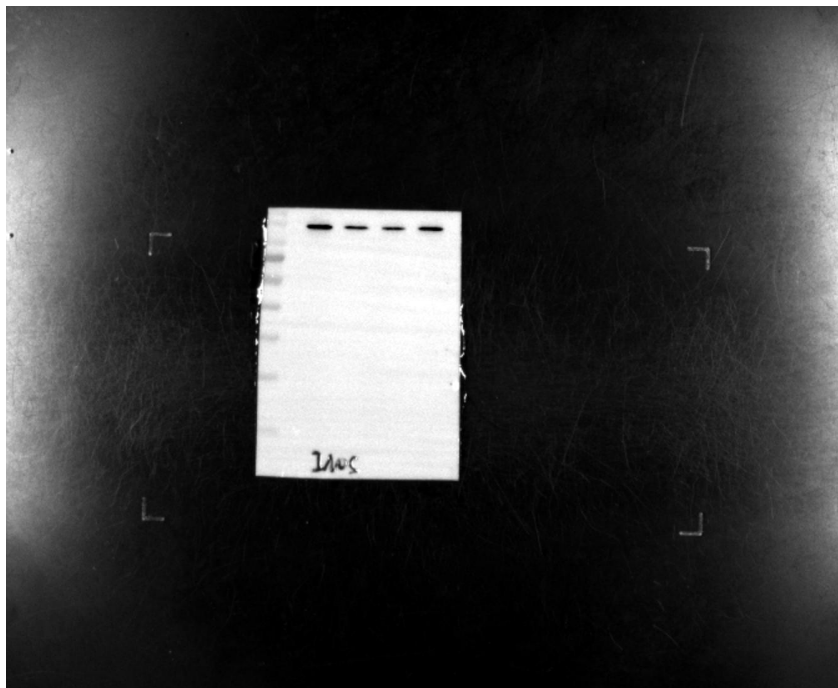

Full unedited gel/blot for Figure 6A GAPDH

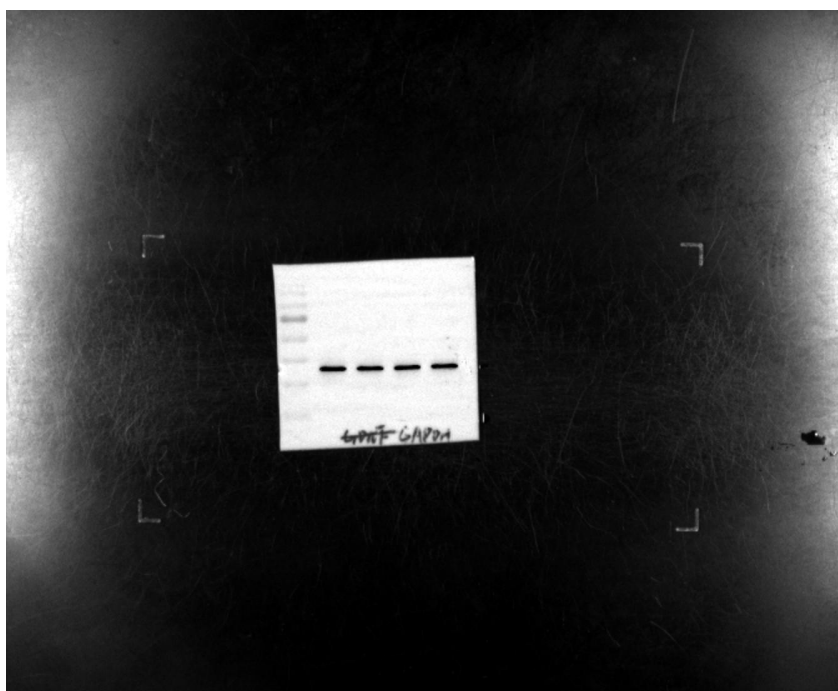

Full unedited gel/blot for Figure 6A GDNF

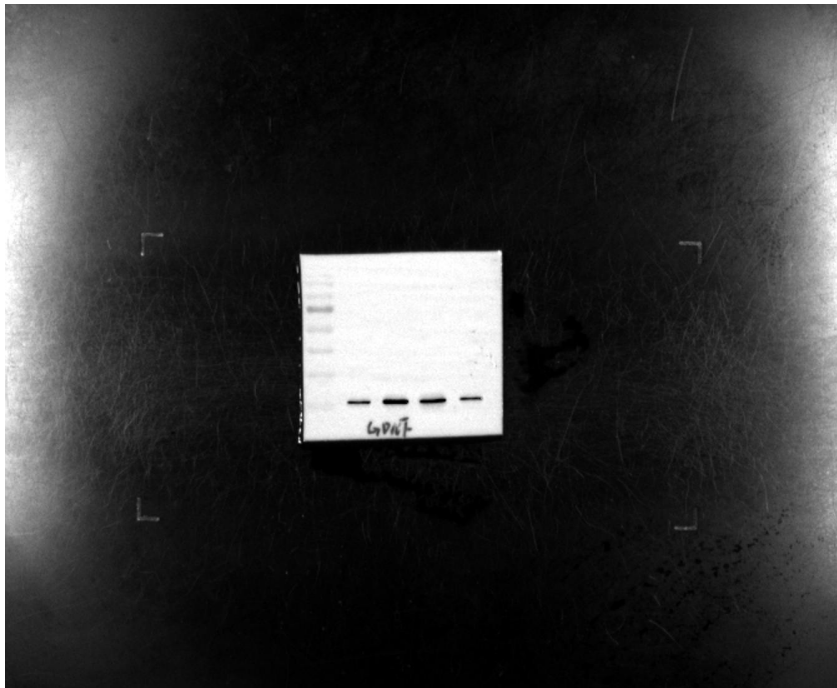

Full unedited gel/blot for Figure 6A PRMT8

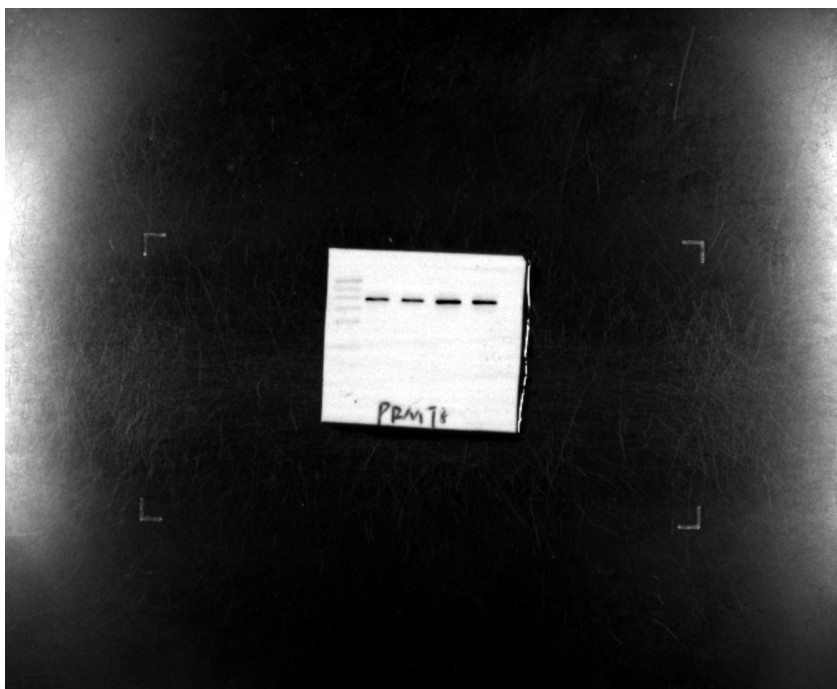

Full unedited gel/blot for Figure 6J GAPDH

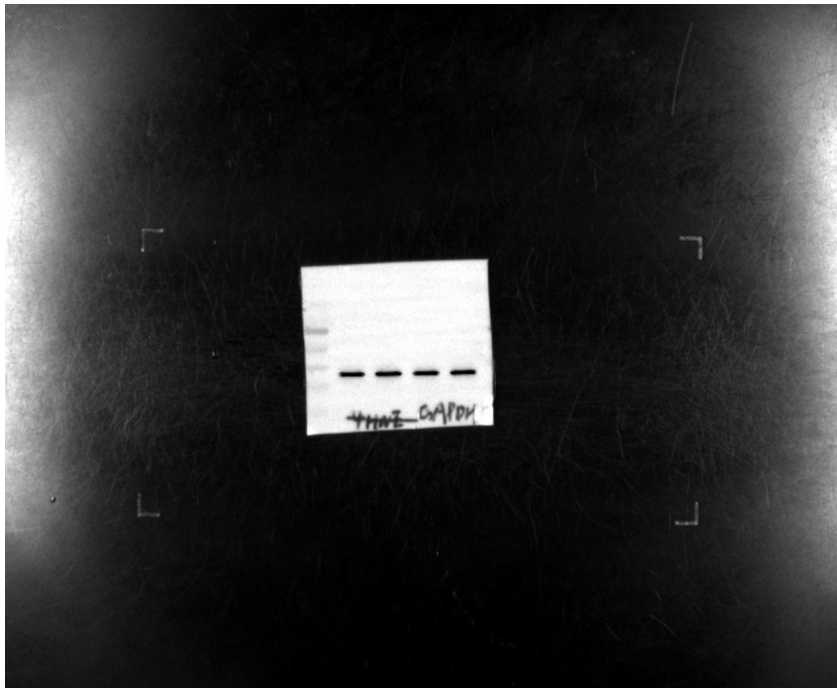

Full unedited gel/blot for Figure 6J 4-HNE

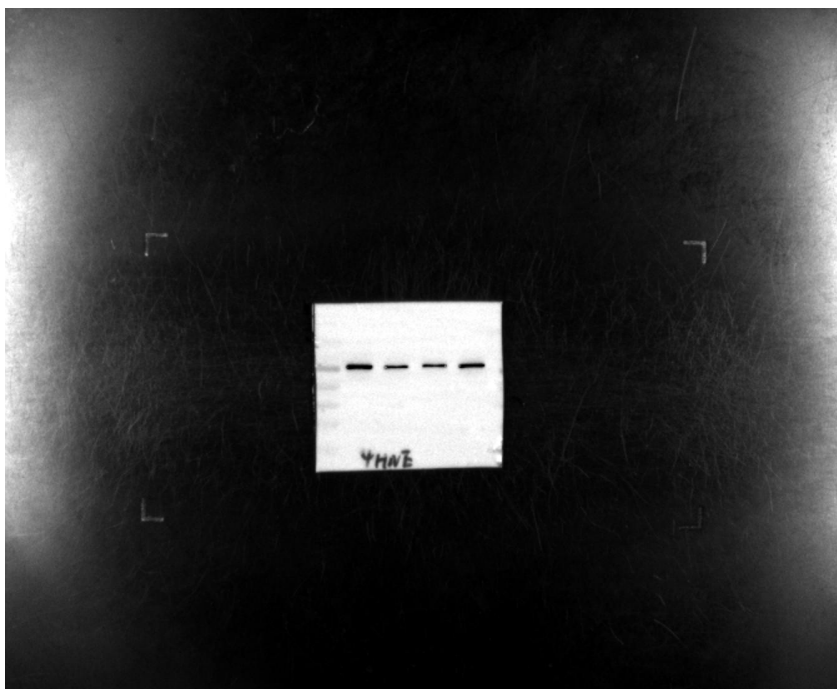

Full unedited gel/blot for Figure 6J GPX4



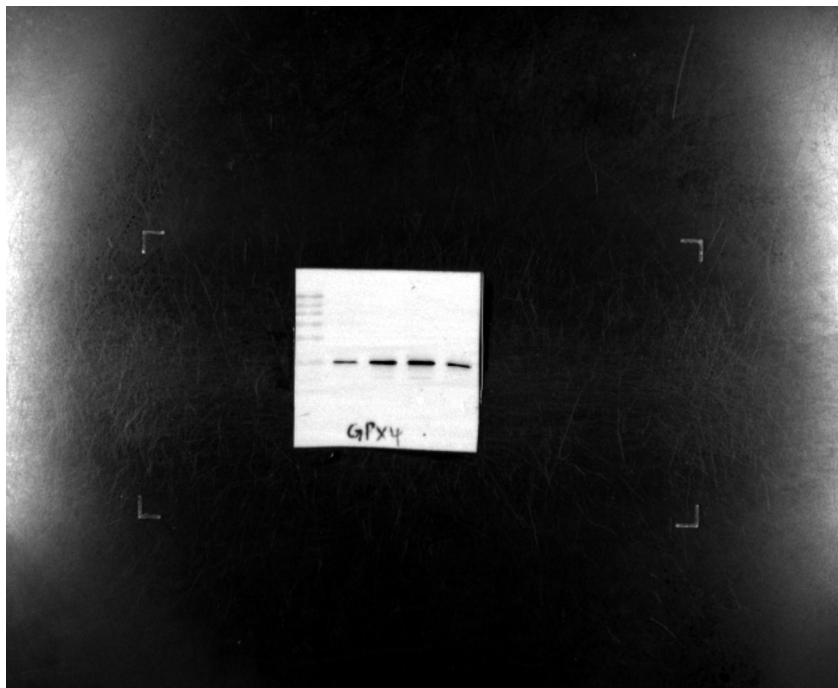

Full unedited gel/blot for Figure 6J XCT

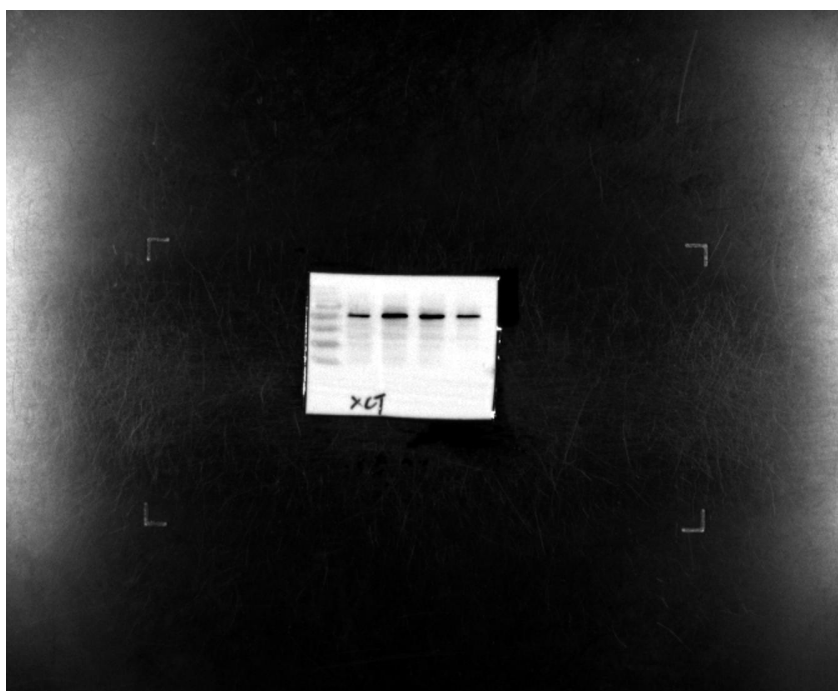

Full unedited gel/blot for Figure 6J GAPDH

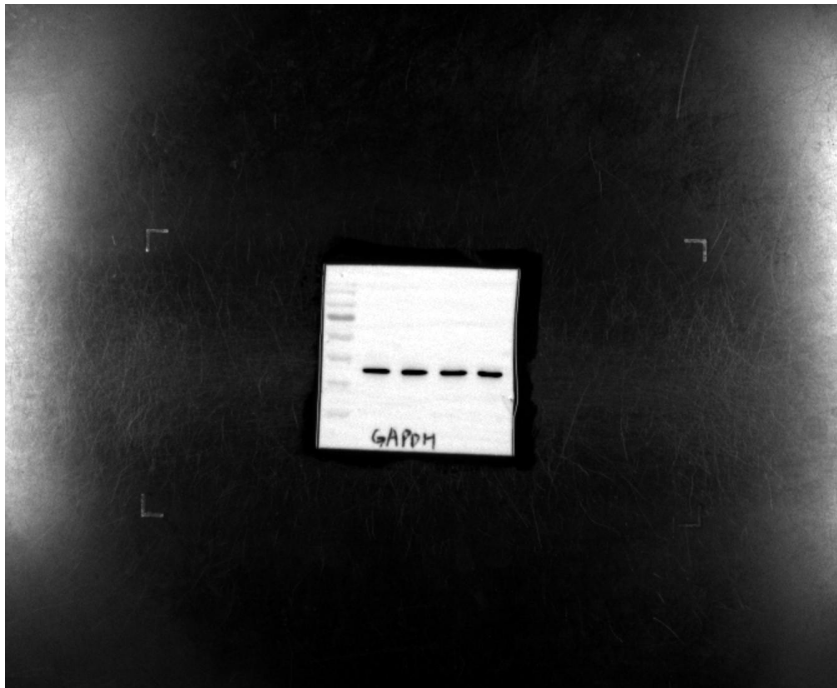

**Full unedited gel/blot for Figure 6J Arg-1**

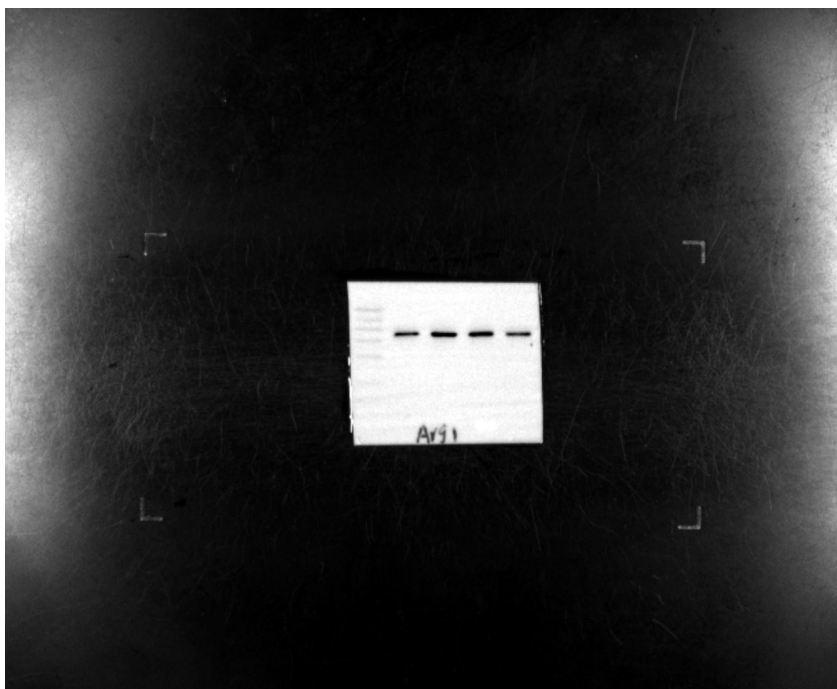

**Full unedited gel/blot for Figure 6J CD16**

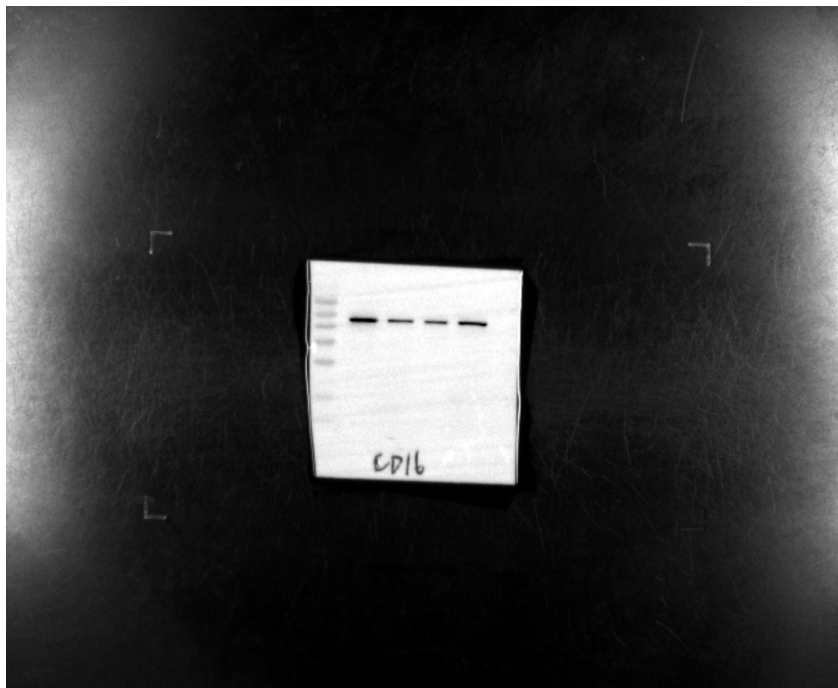

Full unedited gel/blot for Figure 6J INOS

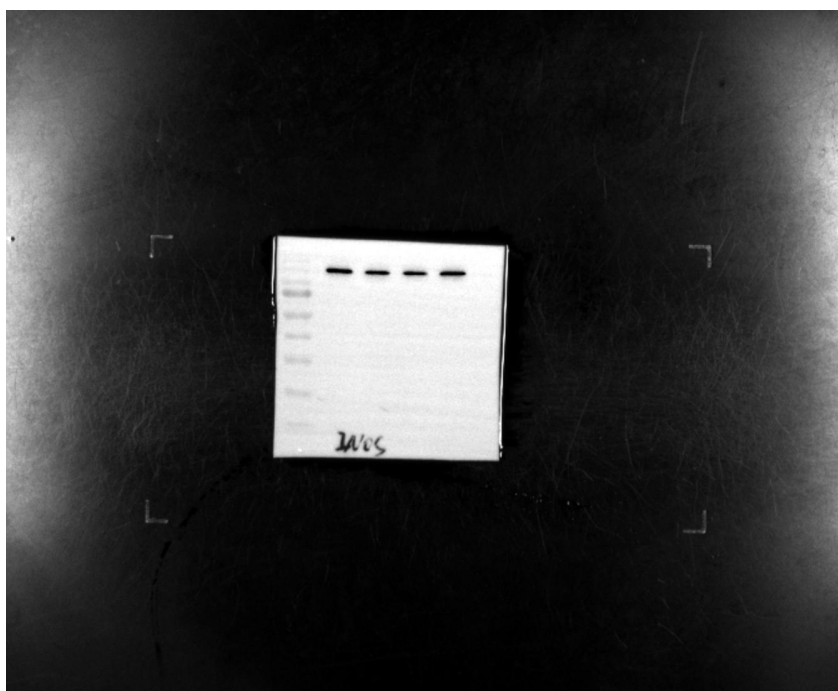

Supplement: CNS-29-2145-s002.pdf [file CNS-29-2145-s002.pdf]
